# Supplementary material
Source: publisher site journal article supplement (https://www.dovepress.com/article/supplementary_file/589733/589733%20Supplementary%20Files%201-4.docx)
Supplement: Supplementary file 1 [file 589733%20Supplementary%20Files%201-4.docx]

| **Supplementary File 1: Mendelian Randomization Analysis of 26 Immune Cell Subtype Traits, with No Significant Instrument Heterogeneity (Q-test, P > 0.05)** | | | | | |
| --- | --- | --- | --- | --- | --- |
| **Exposure** | **Exposure_id** | **Method** | **Q** | **Q_df** | **Q_pval** |
| SSC-A on CD4+ T cell | id:ebi-a-GCST90002081 | Inverse variance weighted | 1.37220282204035 | 3 | 0.712063282358184 |
| SSC-A on plasmacytoid Dendritic Cell | id:ebi-a-GCST90002072 | Inverse variance weighted | 0.511423056505455 | 3 | 0.916374743798002 |
| CD33dim HLA DR+ CD11b- Absolute Count | id:ebi-a-GCST90001527 | Inverse variance weighted | 0.260564380547915 | 1 | 0.609732682736187 |
| CD8dim Natural Killer T Absolute Count | id:ebi-a-GCST90001633 | Inverse variance weighted | 5.73004455199751 | 5 | 0.333379128928884 |
| CD8dim Natural Killer T %T cell | id:ebi-a-GCST90001634 | Inverse variance weighted | 5.45350339960814 | 4 | 0.243846901490711 |
| CD8dim Natural Killer T %lymphocyte | id:ebi-a-GCST90001635 | Inverse variance weighted | 5.62583894626958 | 5 | 0.344344382812574 |
| CD8 on Terminally Differentiated CD8+ T cell | id:ebi-a-GCST90002057 | Inverse variance weighted | 0.569916773667224 | 1 | 0.450291990202043 |
| CD3 on resting CD4 regulatory T cell | id:ebi-a-GCST90001869 | Inverse variance weighted | 0.319714628184572 | 4 | 0.988506242139061 |
| CD28+ CD45RA- CD8+ T cell %T cell | id:ebi-a-GCST90001691 | Inverse variance weighted | 0.25595524921498 | 1 | 0.612912670788233 |
| CD45RA+ CD28- CD8+ T cell %CD8+ T cell | id:ebi-a-GCST90001699 | Inverse variance weighted | 0.913853091009831 | 1 | 0.339094143054822 |
| CD45RA- CD28- CD8+ T cell Absolute Count | id:ebi-a-GCST90001695 | Inverse variance weighted | 123.375627122925 | 100 | 0.0564200420191921 |
| CD45RA+ CD28- CD8+ T cell Absolute Count | id:ebi-a-GCST90001698 | Inverse variance weighted | 326.391528821252 | 294 | 0.0939310592716474 |
| BAFF-R on IgD+ CD24+ B cell | id:ebi-a-GCST90001703 | Inverse variance weighted | 2.32093299802748 | 6 | 0.887945245648074 |
| CCR7 on naive CD4+ T cell | id:ebi-a-GCST90001907 | Inverse variance weighted | 2.04697774316637 | 3 | 0.562713769996948 |
| CD127 on CD45RA+ CD4+ T cell | id:ebi-a-GCST90001932 | Inverse variance weighted | 0.730146407658987 | 2 | 0.694145834884698 |
| BAFF-R on IgD- CD38+ B cell | id:ebi-a-GCST90001713 | Inverse variance weighted | 0.762227533457223 | 2 | 0.683100171127311 |
| IgD on IgD+ CD38- unswitched memory B cell | id:ebi-a-GCST90001823 | Inverse variance weighted | 1.32305101775762 | 1 | 0.25004522162587 |
| IgD on IgD+ CD24+ B cell | id:ebi-a-GCST90001820 | Inverse variance weighted | 10.4567991466019 | 5 | 0.0632795741483373 |
| CD25 on CD24+ CD27+ B cell | id:ebi-a-GCST90001777 | Inverse variance weighted | 1.77418409433792 | 3 | 0.620568814345305 |
| CD25 on memory B cell | id:ebi-a-GCST90001790 | Inverse variance weighted | 1.53558163762651 | 3 | 0.674082787896749 |
| CD25 on IgD+ CD24+ B cell | id:ebi-a-GCST90001778 | Inverse variance weighted | 0.803428069644659 | 2 | 0.669172078244066 |
| CD25 on unswitched memory B cell | id:ebi-a-GCST90001792 | Inverse variance weighted | 1.53821133147412 | 3 | 0.67347966653509 |
| CD25 on IgD- CD38- B cell | id:ebi-a-GCST90001787 | Inverse variance weighted | 0.366877625370627 | 2 | 0.832402806672193 |
| CD39 on monocyte | id:ebi-a-GCST90002034 | Inverse variance weighted | 1.4888439368114 | 1 | 0.222395916227952 |
| Resting CD4 regulatory T cell Absolute Count | id:ebi-a-GCST90001480 | Inverse variance weighted | 6.6056824672089 | 3 | 0.0855865397443574 |
| Lymphocyte Absolute Count | id:ebi-a-GCST90001601 | Inverse variance weighted | 0.32014697608024 | 1 | 0.571519331106172 |
| Data Source: All immune cell subtype phenotypes were derived from published genome-wide association studies (GWAS) datasets, with unique identifiers provided in the exposure column (e.g., ebi-a-GCST90002081). Analysis Method: The inverse variance weighted (IVW) method was used as the primary MR approach to estimate the causal effect of immune cell subtypes on the outcome. This method aggregates Wald ratios from individual instrumental variables (SNPs) to produce a combined causal estimate. Statistical Indicators: Q: Heterogeneity test statistic, which quantifies the inconsistency between effect estimates from individual SNPs. Q_df: Degrees of freedom for the heterogeneity test, corresponding to the number of independent SNPs minus 1. Q_pval: P-value of the heterogeneity test. A P-value > 0.05 indicates no significant heterogeneity across instrumental variables, supporting the validity of the IVW assumption. | | | | | |

| **Supplementary File 2: Horizontal Pleiotropy in Mendelian Randomization of 26 Immune Cell Subtype Traits** | | | | |
| --- | --- | --- | --- | --- |
| **Exposure** | **Exposure_id** | **Egger_intercept** | **se** | **pval** |
| SSC-A on CD4+ T cell | id:ebi-a-GCST90002081 |  |  |  |
| SSC-A on plasmacytoid Dendritic Cell | id:ebi-a-GCST90002072 |  |  |  |
| CD33dim HLA DR+ CD11b- Absolute Count | id:ebi-a-GCST90001527 |  |  |  |
| CD8dim Natural Killer T Absolute Count | id:ebi-a-GCST90001633 | -0.003769283 | 0.0424113395483131 | 0.93345364967132 |
| CD8dim Natural Killer T %T cell | id:ebi-a-GCST90001634 | 0.0552317505945943 | 0.140169798139357 | 0.719893469289333 |
| CD8dim Natural Killer T %lymphocyte | id:ebi-a-GCST90001635 | -0.004832423 | 0.0403426669980958 | 0.910429223607468 |
| CD8 on Terminally Differentiated CD8+ T cell | id:ebi-a-GCST90002057 |  |  |  |
| CD3 on resting CD4 regulatory T cell | id:ebi-a-GCST90001869 | -0.00699275 | 0.0158299293287378 | 0.659639079224111 |
| CD28+ CD45RA- CD8+ T cell %T cell | id:ebi-a-GCST90001691 | -0.005196184 | 0.00796952736267437 | 0.514908094834707 |
| CD45RA+ CD28- CD8+ T cell %CD8+ T cell | id:ebi-a-GCST90001699 |  |  |  |
| CD45RA- CD28- CD8+ T cell Absolute Count | id:ebi-a-GCST90001695 | 0.00555428015311142 | 0.0295314211537158 | 0.85820861253303 |
| CD45RA+ CD28- CD8+ T cell Absolute Count | id:ebi-a-GCST90001698 | -0.012283375 | 0.0389243722749272 | 0.805398362793553 |
| BAFF-R on IgD+ CD24+ B cell | id:ebi-a-GCST90001703 | 0.0102416861631428 | 0.0331359952833963 | 0.78648694645334 |
| CCR7 on naive CD4+ T cell | id:ebi-a-GCST90001907 | -0.002592849 | 0.035795528075268 | 0.953966846596329 |
| CD127 on CD45RA+ CD4+ T cell | id:ebi-a-GCST90001932 | -0.00885725 | 0.063552700108372 | 0.911843053516527 |
| BAFF-R on IgD- CD38+ B cell | id:ebi-a-GCST90001713 | 0.00812956913937336 | 0.0332291912643784 | 0.829537244710821 |
| IgD on IgD+ CD38- unswitched memory B cell | id:ebi-a-GCST90001823 | 0.00879176667728912 | 0.0328040829932581 | 0.8138035675528 |
| IgD on IgD+ CD24+ B cell | id:ebi-a-GCST90001820 | 0.0393955904767145 | 0.0838573265647142 | 0.662969918315547 |
| CD25 on CD24+ CD27+ B cell | id:ebi-a-GCST90001777 |  |  |  |
| CD25 on memory B cell | id:ebi-a-GCST90001790 | -0.012124982 | 0.0349644387288005 | 0.751655597971568 |
| CD25 on IgD+ CD24+ B cell | id:ebi-a-GCST90001778 | -0.077255534 | 0.0542620042010722 | 0.290521103133749 |
| CD25 on unswitched memory B cell | id:ebi-a-GCST90001792 | -0.090117101 | 0.109036484083498 | 0.560297259861625 |
| CD25 on IgD- CD38- B cell | id:ebi-a-GCST90001787 |  |  |  |
| CD39 on monocyte | id:ebi-a-GCST90002034 |  |  |  |
| Resting CD4 regulatory T cell Absolute Count | id:ebi-a-GCST90001480 | -0.022460198 | 0.0852541084587019 | 0.816863283950187 |
| Lymphocyte Absolute Count | id:ebi-a-GCST90001601 | -0.112536115 | 0.316042202077415 | 0.755834512357428 |
| This table presents results of Egger regression, a sensitivity analysis used to detect horizontal pleiotropy in Mendelian randomization (MR) studies. Horizontal pleiotropy occurs when instrumental variables (SNPs) influence the outcome through pathways independent of the exposure (immune cell subtype) of interest.  Column Definitions  Exposure: Immune cell subtype phenotype, with unique GWAS dataset identifiers (e.g., ebi-a-GCST90001633) provided for traceability.  Egger_intercept: Intercept term from the Egger regression model. A non-zero intercept indicates potential horizontal pleiotropy.  se: Standard error of the Egger intercept estimate, reflecting the precision of the regression.  pval: P-value of the Egger intercept test. A P-value > 0.05 suggests no significant horizontal pleiotropy, supporting the validity of MR estimates.  Note: Missing values indicate that Egger regression could not be performed (e.g., insufficient number of instrumental SNPs for reliable estimation). | | | | |

| **Supplementary File 3: Reverse sensitivity analyses of 23 Immune Cell Subtype Traits, with No Significant Instrument Heterogeneity (Q-test, P > 0.05)** | | | | | |
| --- | --- | --- | --- | --- | --- |
| **Outcome** | **Outcome_id** | **Method** | **Q** | **Q_df** | **Q_pval** |
| HLA DR on myeloid Dendritic Cell | id:ebi-a-GCST90002104 | Inverse variance weighted | 10.2222465918639 | 13 | 0.675667313117688 |
| HLA DR on CD33dim HLA DR+ CD11b- | id:ebi-a-GCST90002111 | Inverse variance weighted | 12.8225556555649 | 13 | 0.461609620440836 |
| CD8 on CD28+ CD45RA+ CD8+ T cell | id:ebi-a-GCST90002119 | Inverse variance weighted | 11.7297430067858 | 14 | 0.627996416501383 |
| HLA DR on CD14+ CD16+ monocyte | id:ebi-a-GCST90002007 | Inverse variance weighted | 19.1345034348805 | 14 | 0.159873213524181 |
| CD3 on CD28- CD8+ T cell | id:ebi-a-GCST90001865 | Inverse variance weighted | 15.7711924716862 | 15 | 0.397419239552047 |
| CD4+CD8+ T cell Absolute Count | id:ebi-a-GCST90001594 | Inverse variance weighted | 9.76649617639919 | 15 | 0.834165160307383 |
| Central Memory CD8+ T cell Absolute Count | id:ebi-a-GCST90001548 | Inverse variance weighted | 23.4418313375713 | 15 | 0.0751988835613626 |
| CD4 on naive CD4+ T cell | id:ebi-a-GCST90002024 | Inverse variance weighted | 10.0647812586869 | 13 | 0.688628585738034 |
| CD8 on CD28- CD8+ T cell | id:ebi-a-GCST90002120 | Inverse variance weighted | 8.34674582763578 | 14 | 0.870490609431921 |
| CD127 on CD45RA+ CD4+ T cell | id:ebi-a-GCST90001932 | Inverse variance weighted | 6.6167360194134 | 14 | 0.948478851119068 |
| CD3 on CD8+ T cell | id:ebi-a-GCST90001859 | Inverse variance weighted | 11.4508822686932 | 15 | 0.720026657365668 |
| CD4+CD8+ T cell %T cell | id:ebi-a-GCST90001595 | Inverse variance weighted | 6.83476266823127 | 8 | 0.554561129155809 |
| HLA DR on HLA DR+ CD4+ T cell | id:ebi-a-GCST90002114 | Inverse variance weighted | 13.6644310845268 | 13 | 0.397893542684514 |
| T cell %leukocyte | id:ebi-a-GCST90001605 | Inverse variance weighted | 16.9144621724776 | 15 | 0.324003544895004 |
| Naive CD8+ T cell Absolute Count | id:ebi-a-GCST90001551 | Inverse variance weighted | 25.6602988711053 | 15 | 0.0417485397147151 |
| CD45RA+ CD8+ T cell Absolute Count | id:ebi-a-GCST90001560 | Inverse variance weighted | 18.7920805463931 | 15 | 0.223310880603041 |
| CD4+CD8+ T cell %leukocyte | id:ebi-a-GCST90001608 | Inverse variance weighted | 11.2034008082018 | 15 | 0.738046848070832 |
| CD25 on IgD+ CD38dim B cell | id:ebi-a-GCST90001784 | Inverse variance weighted | 12.9534872316463 | 15 | 0.605890681235217 |
| CD45 on lymphocyte | id:ebi-a-GCST90002041 | Inverse variance weighted | 14.9152965847849 | 14 | 0.383969351143676 |
| IgD+ CD38dim B cell %B cell | id:ebi-a-GCST90001393 | Inverse variance weighted | 14.7955198540278 | 15 | 0.466244205730085 |
| CD45 on T cell | id:ebi-a-GCST90001915 | Inverse variance weighted | 10.5030876605099 | 15 | 0.7869590246855 |
| IgD+ CD38dim B cell %lymphocyte | id:ebi-a-GCST90001430 | Inverse variance weighted | 13.7976654166939 | 15 | 0.540926769039083 |
| CD45 on HLA DR+ CD4+ T cell | id:ebi-a-GCST90001920 | Inverse variance weighted | 9.92008849366401 | 15 | 0.824736222515128 |
| Data Source: All immune cell subtype phenotypes were derived from published genome-wide association studies (GWAS) datasets, with unique identifiers provided in the exposure column. Analysis Method: The inverse variance weighted (IVW) method was used as the primary MR approach to estimate the causal effect of immune cell subtypes on the outcome. This method aggregates Wald ratios from individual instrumental variables (SNPs) to produce a combined causal estimate. Statistical Indicators: Q: Heterogeneity test statistic, which quantifies the inconsistency between effect estimates from individual SNPs. Q_df: Degrees of freedom for the heterogeneity test, corresponding to the number of independent SNPs minus 1. Q_pval: P-value of the heterogeneity test. A P-value > 0.05 indicates no significant heterogeneity across instrumental variables, supporting the validity of the IVW assumption. | | | | | |

| **Supplementary File 4: Horizontal Pleiotropy in Mendelian Randomization of 23 Immune Cell Subtype Traits (Reverse sensitivity analyses)** | | | | |
| --- | --- | --- | --- | --- |
| Outcome | Outcome_id | Egger_intercept | se | pval |
| HLA DR on myeloid Dendritic Cell | ebi-a-GCST90002104 | -0.007859151 | 0.0219364078136957 | 0.725892090223951 |
| HLA DR on CD33dim HLA DR+ CD11b- | ebi-a-GCST90002111 | -0.040722213 | 0.0209554435203915 | 0.0739551743148171 |
| CD8 on CD28+ CD45RA+ CD8+ T cell | ebi-a-GCST90002119 | -0.039642106 | 0.0193471260860105 | 0.0596897990360162 |
| HLA DR on CD14+ CD16+ monocyte | ebi-a-GCST90002007 | -0.025674806 | 0.0179108932545865 | 0.173676824949701 |
| CD3 on CD28- CD8+ T cell | ebi-a-GCST90001865 | -0.002548802 | 0.018241763796825 | 0.890868699340977 |
| CD4+CD8+ T cell Absolute Count | ebi-a-GCST90001594 | -0.021781784 | 0.0166342094910886 | 0.21305076537183 |
| Central Memory CD8+ T cell Absolute Count | ebi-a-GCST90001548 | -0.013137701 | 0.0170079389508522 | 0.452694584627661 |
| CD4 on naive CD4+ T cell | ebi-a-GCST90002024 | 0.00367766147508198 | 0.0191844724048457 | 0.85072984775572 |
| CD8 on CD28- CD8+ T cell | ebi-a-GCST90002120 | -0.004222252 | 0.0195925439476653 | 0.832994550148798 |
| CD127 on CD45RA+ CD4+ T cell | ebi-a-GCST90001932 | -0.896527764 | 1.73680408617027 | 0.613775059580917 |
| CD3 on CD8+ T cell | ebi-a-GCST90001859 | 0.000559929779544841 | 0.0179677364209093 | 0.975579404610642 |
| CD4+CD8+ T cell %T cell | ebi-a-GCST90001595 | 0.00371422814922802 | 0.0212523423721487 | 0.863764252344946 |
| HLA DR on HLA DR+ CD4+ T cell | ebi-a-GCST90002114 | 0.0197598125864812 | 0.0182793756005488 | 0.299347875008683 |
| T cell %leukocyte | ebi-a-GCST90001605 | -0.011432859 | 0.0195861735792773 | 0.568693986951109 |
| Naive CD8+ T cell Absolute Count | ebi-a-GCST90001551 | 0.103103105006646 | 0.228039056545799 | 0.658102042028205 |
| CD45RA+ CD8+ T cell Absolute Count | ebi-a-GCST90001560 | 0.00385121260675945 | 0.0215759214626382 | 0.860890783116139 |
| CD4+CD8+ T cell %leukocyte | ebi-a-GCST90001608 | -0.000157982 | 0.0190553668146695 | 0.993502053117379 |
| CD25 on IgD+ CD38dim B cell | ebi-a-GCST90001784 | 0.00468276984466347 | 0.0158416918681226 | 0.771876089965985 |
| CD45 on lymphocyte | ebi-a-GCST90002041 | 0.00661602927620444 | 0.0161126767865847 | 0.687573694432546 |
| CD8 on CD28- CD8+ T cell | id:ebi-a-GCST90002120 | -0.026235838 | 0.0293822538157092 | 0.412811125211357 |
| IgD+ CD38dim B cell % lymphocyte | ebi-a-GCST90001430 | 0.0095022645604441 | 0.0180335275527544 | 0.60649668756027 |
| CD45 on T cell | ebi-a-GCST90001915 | 0.0243052114853315 | 0.0180382411448667 | 0.200858734710624 |
| CD45 on HLA DR+ CD4+ T cell | ebi-a-GCST90001920 | -0.002541392 | 0.0164840700558596 | 0.879674079618715 |
| This table presents results of Egger regression, a sensitivity analysis used to detect horizontal pleiotropy in Mendelian randomization (MR) studies. Horizontal pleiotropy occurs when instrumental variables (SNPs) influence the outcome through pathways independent of the exposure (immune cell subtype) of interest. Column Definitions Outcome: Immune cell subtype phenotype, with unique GWAS dataset identifiers provided for traceability. Egger_intercept: Intercept term from the Egger regression model. A non-zero intercept indicates potential horizontal pleiotropy. se: Standard error of the Egger intercept estimate, reflecting the precision of the regression. pval: P-value of the Egger intercept test. A P-value > 0.05 suggests no significant horizontal pleiotropy, supporting the validity of MR estimates. Note: Missing values indicate that Egger regression could not be performed (e.g., insufficient number of instrumental SNPs for reliable estimation). | | | | |
